# Supplementary material
Source: ML conference proceedings conference paper supplement (https://openreview.net/forum?id=P7YgBpXf90)
Supplement: supplementary_material [file attachment]

# Supplementary Materials: Generalizing ISP Model by Unsupervised Raw-to-raw Mapping

Anonymous Authors

## 1 DETAILED EXPERIMENT RESULTS OF CROSS CAMERA ISP TASK

In Sec. 4.3 of the main text, we report the average performance of four deep ISP models [2–5]. Here, we present their separate performances. Quantitative results can be found in Table 1. Additionally, more visualization results are illustrated in Fig. 1 and Fig. 2.

**Table 1: Detailed quantitative results of the cross-camera ISP task. Results were obtained by training and testing four Deep ISP models: PyNET[5], microISP[4], PyNET-v2[3], and syenet[2]. Bold indicates the best result.**

| ISP Model    | R2r Model          | Deploy iPhone-x ISP After Samsung-s9 Sensor |                    |             |              | Deploy Samsung-s9 ISP After iPhone-x Sensor |                    |             |              |
|--------------|--------------------|---------------------------------------------|--------------------|-------------|--------------|---------------------------------------------|--------------------|-------------|--------------|
|              |                    | Train Set                                   | Test Set           | KL↓         | FID↓         | Train Set                                   | Test Set           | KL↓         | FID↓         |
| PyNET [5]    | W/o R2r            | $A \rightarrow A$                           | $B \rightarrow A$  | 1.18        | 76.21        | $B \rightarrow B$                           | $A \rightarrow B$  | 2.07        | 78.81        |
|              | UVCGAN [6]         | $AB \rightarrow A$                          | $B \rightarrow A$  | 1.36        | 82.39        | $BA \rightarrow B$                          | $A \rightarrow B$  | 1.00        | 81.11        |
|              |                    | $A \rightarrow A$                           | $BA \rightarrow A$ | <b>0.72</b> | 125.16       | $B \rightarrow B$                           | $AB \rightarrow B$ | 0.90        | 88.79        |
|              | Afifi et al.'s [1] | $AB \rightarrow A$                          | $B \rightarrow A$  | 1.14        | 59.83        | $BA \rightarrow B$                          | $A \rightarrow B$  | <b>0.74</b> | 69.63        |
|              |                    | $A \rightarrow A$                           | $BA \rightarrow A$ | 0.97        | 74.22        | $B \rightarrow B$                           | $AB \rightarrow B$ | 0.76        | 75.43        |
|              | Ours               | $AB \rightarrow A$                          | $B \rightarrow A$  | <b>0.90</b> | <b>54.97</b> | $BA \rightarrow B$                          | $A \rightarrow B$  | 0.83        | <b>64.84</b> |
|              |                    | $A \rightarrow A$                           | $BA \rightarrow A$ | 0.75        | <b>60.17</b> | $B \rightarrow B$                           | $AB \rightarrow B$ | <b>0.75</b> | <b>71.66</b> |
| MicroISP [4] | W/o R2r            | $A \rightarrow A$                           | $B \rightarrow A$  | 1.48        | 84.60        | $B \rightarrow B$                           | $A \rightarrow B$  | 2.18        | 83.58        |
|              | UVCGAN [6]         | $AB \rightarrow A$                          | $B \rightarrow A$  | 0.91        | 127.72       | $BA \rightarrow B$                          | $A \rightarrow B$  | 0.96        | 92.48        |
|              |                    | $A \rightarrow A$                           | $BA \rightarrow A$ | 1.24        | 80.30        | $B \rightarrow B$                           | $AB \rightarrow B$ | 1.00        | 88.07        |
|              | Afifi et al.'s [1] | $AB \rightarrow A$                          | $B \rightarrow A$  | <b>0.82</b> | <b>58.01</b> | $BA \rightarrow B$                          | $A \rightarrow B$  | <b>0.67</b> | <b>71.45</b> |
|              |                    | $A \rightarrow A$                           | $BA \rightarrow A$ | 1.01        | 76.19        | $B \rightarrow B$                           | $AB \rightarrow B$ | <b>0.89</b> | 81.66        |
|              | Ours               | $AB \rightarrow A$                          | $B \rightarrow A$  | 0.86        | 64.62        | $BA \rightarrow B$                          | $A \rightarrow B$  | 0.88        | 76.49        |
|              |                    | $A \rightarrow A$                           | $BA \rightarrow A$ | <b>0.95</b> | <b>63.90</b> | $B \rightarrow B$                           | $AB \rightarrow B$ | 1.13        | <b>78.12</b> |
| PyNET-v2 [3] | W/o R2r            | $A \rightarrow A$                           | $B \rightarrow A$  | 1.41        | 80.79        | $B \rightarrow B$                           | $A \rightarrow B$  | 2.34        | 81.08        |
|              | UVCGAN [6]         | $AB \rightarrow A$                          | $B \rightarrow A$  | 1.41        | 78.62        | $BA \rightarrow B$                          | $A \rightarrow B$  | 1.03        | 71.84        |
|              |                    | $A \rightarrow A$                           | $BA \rightarrow A$ | 0.87        | 128.77       | $B \rightarrow B$                           | $AB \rightarrow B$ | 0.96        | 92.67        |
|              | Afifi et al.'s [1] | $AB \rightarrow A$                          | $B \rightarrow A$  | 1.01        | 75.11        | $BA \rightarrow B$                          | $A \rightarrow B$  | 0.78        | 77.80        |
|              |                    | $A \rightarrow A$                           | $BA \rightarrow A$ | <b>0.69</b> | <b>61.49</b> | $B \rightarrow B$                           | $AB \rightarrow B$ | <b>0.71</b> | 79.73        |
|              | Ours               | $AB \rightarrow A$                          | $B \rightarrow A$  | <b>0.71</b> | <b>61.12</b> | $BA \rightarrow B$                          | $A \rightarrow B$  | <b>0.77</b> | <b>68.62</b> |
|              |                    | $A \rightarrow A$                           | $BA \rightarrow A$ | 1.10        | 63.82        | $B \rightarrow B$                           | $AB \rightarrow B$ | 0.72        | <b>68.07</b> |
| syenet [2]   | W/o R2r            | $A \rightarrow A$                           | $B \rightarrow A$  | 1.65        | 82.11        | $B \rightarrow B$                           | $A \rightarrow B$  | 2.16        | 88.69        |
|              | UVCGAN [6]         | $AB \rightarrow A$                          | $B \rightarrow A$  | <b>1.02</b> | 85.97        | $BA \rightarrow B$                          | $A \rightarrow B$  | 0.91        | 101.22       |
|              |                    | $A \rightarrow A$                           | $BA \rightarrow A$ | 1.15        | 133.62       | $B \rightarrow B$                           | $AB \rightarrow B$ | 0.69        | 126.90       |
|              | Afifi et al.'s [1] | $AB \rightarrow A$                          | $B \rightarrow A$  | 1.25        | 75.11        | $BA \rightarrow B$                          | $A \rightarrow B$  | <b>0.72</b> | 92.89        |
|              |                    | $A \rightarrow A$                           | $BA \rightarrow A$ | 1.63        | 86.80        | $B \rightarrow B$                           | $AB \rightarrow B$ | 0.71        | 79.73        |
|              | Ours               | $AB \rightarrow A$                          | $B \rightarrow A$  | 1.63        | <b>64.45</b> | $BA \rightarrow B$                          | $A \rightarrow B$  | <b>0.72</b> | <b>68.07</b> |
|              |                    | $A \rightarrow A$                           | $BA \rightarrow A$ | <b>1.06</b> | <b>62.24</b> | $B \rightarrow B$                           | $AB \rightarrow B$ | <b>0.68</b> | <b>78.13</b> |
| Average      | W/o R2r            | $A \rightarrow A$                           | $B \rightarrow A$  | 1.43        | 80.93        | $B \rightarrow B$                           | $A \rightarrow B$  | 2.19        | 83.04        |
|              | UVCGAN [6]         | $AB \rightarrow A$                          | $B \rightarrow A$  | 1.18        | 93.68        | $BA \rightarrow B$                          | $A \rightarrow B$  | 0.98        | 86.66        |
|              |                    | $A \rightarrow A$                           | $BA \rightarrow A$ | 1.00        | 116.96       | $B \rightarrow B$                           | $AB \rightarrow B$ | 0.89        | 99.11        |
|              | Afifi et al.'s [1] | $AB \rightarrow A$                          | $B \rightarrow A$  | 1.06        | 67.01        | $BA \rightarrow B$                          | $A \rightarrow B$  | <b>0.73</b> | 77.94        |
|              |                    | $A \rightarrow A$                           | $BA \rightarrow A$ | 1.08        | 74.68        | $B \rightarrow B$                           | $AB \rightarrow B$ | <b>0.77</b> | 79.14        |
|              | Ours               | $AB \rightarrow A$                          | $B \rightarrow A$  | <b>1.03</b> | <b>61.29</b> | $BA \rightarrow B$                          | $A \rightarrow B$  | 0.80        | <b>69.51</b> |
|              |                    | $A \rightarrow A$                           | $BA \rightarrow A$ | <b>0.97</b> | <b>62.53</b> | $B \rightarrow B$                           | $AB \rightarrow B$ | 0.82        | <b>74.00</b> |

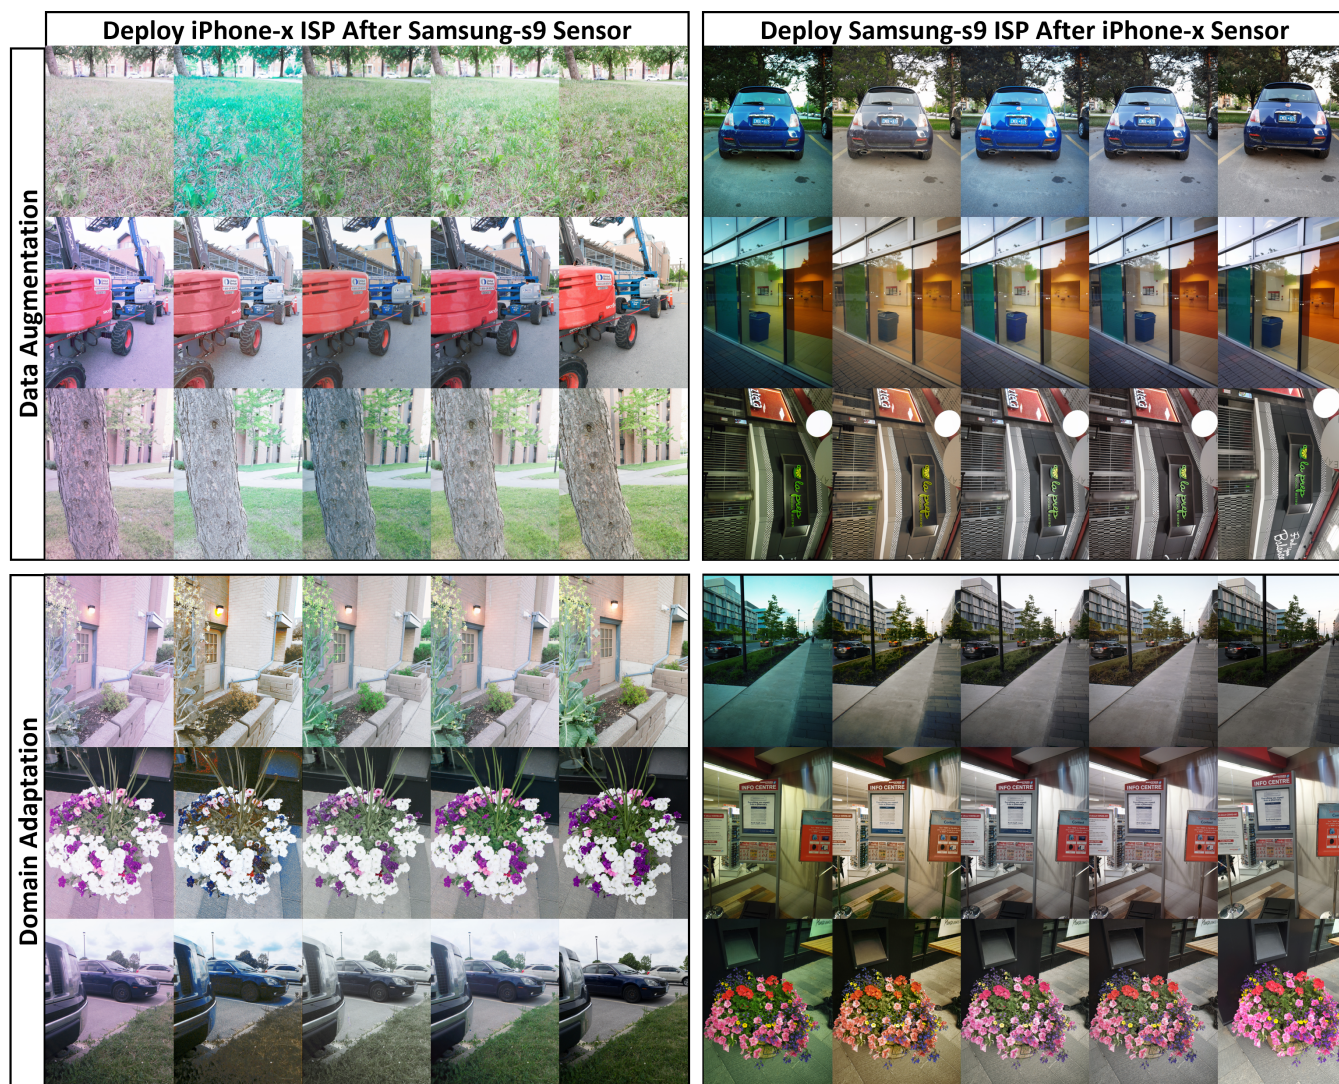

Figure 1: Qualitative results of the cross-camera ISP task using PyNET [5]. Each block, from left to right, represents the w/o r2r, UVCGAN [6], Affi et al.'s [1], our method, and ground truth, respectively.



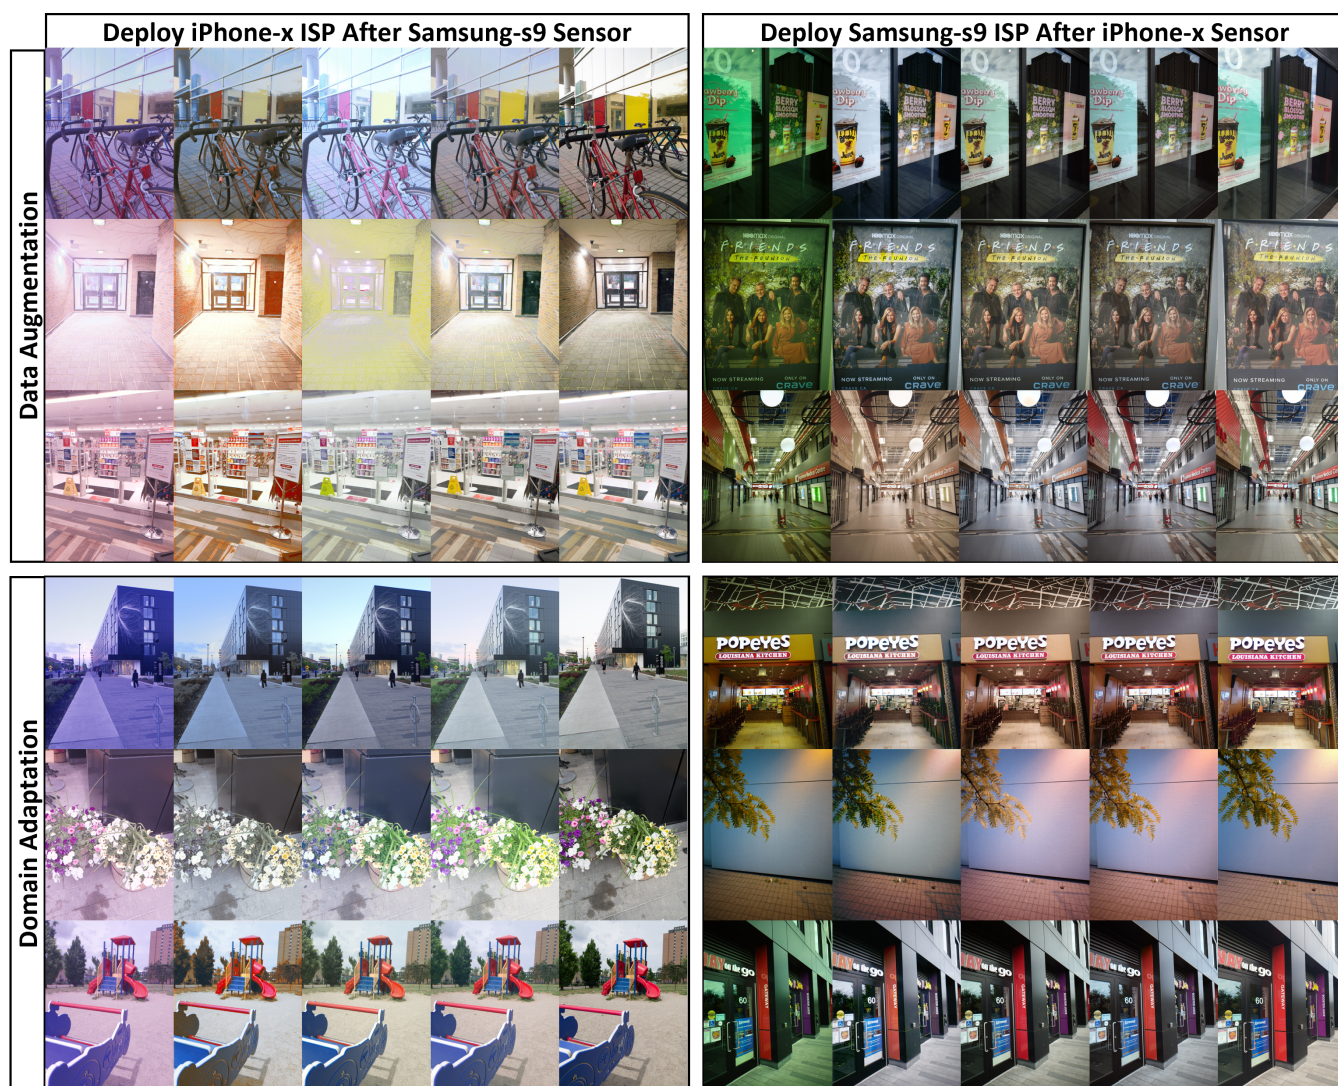

Figure 2: Qualitative results of the cross-camera ISP task using syenet [2]. Each block, from left to right, represents the w/o r2r, UVCGAN [6], Affi et al.'s [1], our method, and ground truth, respectively.

REFERENCES

[1] Mahmoud Afifi and Abdullah Abuolaim. 2021. Semi-Supervised Raw-to-Raw Mapping. In *British Machine Vision Conference (BMVC)*.  
[2] Weiran Gou, Ziyao Yi, Yan Xiang, Shaoqing Li, Zibin Liu, Dehui Kong, and Ke Xu. 2023. SYENet: A Simple Yet Effective Network for Multiple Low-Level Vision Tasks with Real-time Performance on Mobile Device. In *Proceedings of the IEEE/CVF International Conference on Computer Vision*. 12182–12195.  
[3] Andrey Ignatov, Grigory Malivenko, Radu Timofte, Yu Tseng, Yu-Syuan Xu, Po-Hsiang Yu, Cheng-Ming Chiang, Hsien-Kai Kuo, Min-Hung Chen, Chia-Ming Cheng, et al. 2022. Pynet-v2 mobile: Efficient on-device photo processing with neural networks. In *2022 26th International Conference on Pattern Recognition*

(ICPR). IEEE, 677–684.  
[4] Andrey Ignatov, Anastasia Sycheva, Radu Timofte, Yu Tseng, Yu-Syuan Xu, Po-Hsiang Yu, Cheng-Ming Chiang, Hsien-Kai Kuo, Min-Hung Chen, Chia-Ming Cheng, et al. 2022. MicroISP: processing 32mp photos on mobile devices with deep learning. In *European Conference on Computer Vision*. Springer, 729–746.  
[5] Andrey Ignatov, Luc Van Gool, and Radu Timofte. 2020. Replacing mobile camera isp with a single deep learning model. In *Proceedings of the IEEE/CVF conference on computer vision and pattern recognition workshops*. 536–537.  
[6] Dmitrii Torbunov, Yi Huang, Haiwang Yu, Jin Huang, Shinjae Yoo, Meifeng Lin, Brett Viren, and Yihui Ren. 2023. Uvcgan: Unet vision transformer cycle-consistent gan for unpaired image-to-image translation. In *Proceedings of the IEEE/CVF winter conference on applications of computer vision*. 702–712.
